# Supplementary material
Source: MDPI journal article supplement (https://www.mdpi.com/2073-4468/13/1/22)
Supplement: s1 [file s1]

**Table S3.** Search strategies

| <b>Databases</b> | <b>Search strategies</b>                                                                                                                                                                                                                                                |
|------------------|-------------------------------------------------------------------------------------------------------------------------------------------------------------------------------------------------------------------------------------------------------------------------|
| PubMed           | (antiphospholipid[Title/Abstract] OR anti-phospholipid[Title/Abstract] OR anti-phospholipid[Title/Abstract] OR APS[Title/Abstract]) AND ("vitamin D"[Title/Abstract] OR "25 OH D"[Title/Abstract] OR hypovitaminosis[Title/Abstract] OR hydroxyvitamin[Title/Abstract]) |
| Web of Science   | TI=(antiphospholipid OR anti-phospholipid OR anti-phospholipid OR APS) AND TI=("vitamin D" OR "25 OH D" OR hypovitaminosis OR hydroxyvitamin)                                                                                                                           |
| Scopus           | TITLE(antiphospholipid OR anti-phospholipid OR anti-phospholipid OR APS) AND TITLE-ABS("vitamin D" OR "25 OH D" OR hypovitaminosis OR hydroxyvitamin)                                                                                                                   |
| Google Scholar   | allintitle:(antiphospholipid OR anti-phospholipid OR anti-phospholipid OR APS) ("vitamin D" OR "25 OH D" OR hypovitaminosis OR hydroxyvitamin)                                                                                                                          |
| ScienceDirect    | Title, abstract, keywords: (antiphospholipid OR anti-phospholipid OR anti-phospholipid OR APS) AND ("vitamin D" OR "25 OH D" OR hypovitaminosis OR hydroxyvitamin)                                                                                                      |
