# Supplementary material
Source: MDPI journal article supplement (https://www.mdpi.com/2073-4468/13/1/22)
Supplement: s1 [file s1]

## Supplementary Materials

*Table S1. MOOSE Checklist*

| Item No | Criteria                              | Sentences mentioned in the meta-analysis or appropriate explanations                                                                                                                                                                                                                                                                                                                                                                                                                                   |
|---------|---------------------------------------|--------------------------------------------------------------------------------------------------------------------------------------------------------------------------------------------------------------------------------------------------------------------------------------------------------------------------------------------------------------------------------------------------------------------------------------------------------------------------------------------------------|
| 1       | Problem definition                    | High prevalence of low serum levels of vitamin D has been observed worldwide involving both healthy and ill subjects including patients with rheumatic diseases. Vitamin D insufficiency and/or deficiency have been observed in many autoimmune diseases like rheumatoid arthritis, Sjögren syndrome, SLE, Behçet's disease, multiple sclerosis and systemic sclerosis. Additionally, serum levels of vitamin D were observed to be inversely associated with thrombotic events in patients with APS. |
| 2       | Hypothesis statement                  | Although there is a growing body of evidence indicating the tendency of manifesting low serum levels of vitamin D in patients with APS, it is inconclusive.                                                                                                                                                                                                                                                                                                                                            |
| 3       | Description of study outcome(s)       | To evaluate the serum levels of vitamin D in patients with PAPS in compared to healthy controls.                                                                                                                                                                                                                                                                                                                                                                                                       |
| 4       | Type of exposure or intervention used | Serum levels of vitamin D.                                                                                                                                                                                                                                                                                                                                                                                                                                                                             |
| 5       | Type of study designs used            | Case-control & Cross-sectional studies.                                                                                                                                                                                                                                                                                                                                                                                                                                                                |
| 6       | Study population                      | APS of adult age ( $\geq 18$ years), of any sex or race were considered eligible patients. Adult healthy subjects ( $\geq 18$ years) of any sex or race were considered eligible control                                                                                                                                                                                                                                                                                                               |

|   |                                                                               |                                                                                                                                                                                                                                                                                                                                                                                                                                                                                                                                                                                                                                                                                                                                                                                                                                                                                                                                                                                                                                                |
|---|-------------------------------------------------------------------------------|------------------------------------------------------------------------------------------------------------------------------------------------------------------------------------------------------------------------------------------------------------------------------------------------------------------------------------------------------------------------------------------------------------------------------------------------------------------------------------------------------------------------------------------------------------------------------------------------------------------------------------------------------------------------------------------------------------------------------------------------------------------------------------------------------------------------------------------------------------------------------------------------------------------------------------------------------------------------------------------------------------------------------------------------|
|   |                                                                               | participants.                                                                                                                                                                                                                                                                                                                                                                                                                                                                                                                                                                                                                                                                                                                                                                                                                                                                                                                                                                                                                                  |
| 7 | Qualifications of searchers (e.g., librarians and investigators)              | M.A.I. (PhD), S.A. (MSc), S.S. (MSc), S.S.A. (BSc)                                                                                                                                                                                                                                                                                                                                                                                                                                                                                                                                                                                                                                                                                                                                                                                                                                                                                                                                                                                             |
| 8 | Search strategy, including time period included in the synthesis and keywords | <p>Electronic databases including PubMed, Scopus, Web of Science, ScienceDirect and Google Scholar were searched and screened independently by three authors (M.A.I, S.A. and S.S.A.). The final systematic search was conducted on May 31, 2023. There were no year and language restrictions.</p> <p>PubMed. (((((antiphospholipid[Title/Abstract]) OR anti-phospholipid[Title/Abstract]) OR APS[Title/Abstract])) AND ((((((vitamin D"[Title/Abstract]) OR "25-hydroxyvitamin D"[Title/Abstract]) OR "25(OH)D"[Title/Abstract]) OR Cholecalciferol[Title/Abstract]) OR Ergocalciferol[Title/Abstract]) OR Calcifediol[Title/Abstract]))</p> <p>Scopus. TITLE(antiphospholipid OR anti-phospholipid OR APS) AND TITLE("vitamin D" OR "25-hydroxyvitamin D" OR "25(OH)D" OR Cholecalciferol OR Ergocalciferol OR Calcifediol)</p> <p>ScienceDirect. Title, abstract, keywords: (antiphospholipid OR anti-phospholipid OR APS) AND ("vitamin D" OR "25-hydroxyvitamin D" OR "25(OH)D" OR Cholecalciferol OR Ergocalciferol OR Calcifediol)</p> |

|    |                                                                                           |                                                                                                                                                                                                                                                                                                                                                                |
|----|-------------------------------------------------------------------------------------------|----------------------------------------------------------------------------------------------------------------------------------------------------------------------------------------------------------------------------------------------------------------------------------------------------------------------------------------------------------------|
|    |                                                                                           | <p>Web of Science. TI=(antiphospholipid OR anti-phospholipid OR anti-phospholipid OR APS) AND TI=("vitamin D" OR "25 OH D" OR hypovitaminosis OR hydroxyvitamin)</p> <p>Google Scholar. allintitle: (antiphospholipid OR anti-phospholipid OR APS) ("vitamin D" OR "25-hydroxyvitamin D" OR "25(OH)D" OR Cholecalciferol OR Ergocalciferol OR Calcifediol)</p> |
| 9  | Effort to include all available studies, including contact with authors                   | Three authors (M.A.I., S.A. and S.S.A.) took part in the discussion to resolve any discrepancies, unclear or missing data presentation. If unresolved, either the corresponding or the first author of the respective study was contacted for further clarifications.                                                                                          |
| 10 | Databases and registries searched                                                         | Electronic databases including PubMed, Scopus, Web of Science, ScienceDirect and Google Scholar were searched                                                                                                                                                                                                                                                  |
| 11 | Search software used, name and version, including special features used (e.g., explosion) | Duplicate studies which may result from different electronic databases were removed and managed by EndNote software (version X8).                                                                                                                                                                                                                              |
| 12 | Use of hand searching (e.g., reference lists of obtained articles)                        | In addition, references in the primary selected studies were also examined to identify any other possible relevant studies.                                                                                                                                                                                                                                    |
| 13 | List of citations located and those excluded, including justification                     | Table 1 and Supplementary Table S3                                                                                                                                                                                                                                                                                                                             |
| 14 | Method of addressing articles                                                             | There were no year and language restrictions.                                                                                                                                                                                                                                                                                                                  |

|    |                                                                                                                                            |                                                                                                                                                                                                                                                                                |
|----|--------------------------------------------------------------------------------------------------------------------------------------------|--------------------------------------------------------------------------------------------------------------------------------------------------------------------------------------------------------------------------------------------------------------------------------|
|    | published in languages other than English                                                                                                  | However, no articles were found other than in English.                                                                                                                                                                                                                         |
| 15 | Method of handling abstracts and unpublished studies                                                                                       | We did not consider unpublished studies to be included in the analysis.                                                                                                                                                                                                        |
| 16 | Description of any contact with authors                                                                                                    | Prof. Dr. Yehuda Shoenfeld was contacted about the raw data of the included study Orbach 2007.                                                                                                                                                                                 |
| 17 | Description of relevance or appropriateness of studies assembled for assessing the hypothesis to be tested                                 | Detailed inclusion and exclusion criteria were described in "Eligibility criteria" of "Methods" section.                                                                                                                                                                       |
| 18 | Rationale for the selection and coding of data (e.g., sound clinical principles or convenience)                                            | Selection of the studies was based on the inclusion and exclusion criteria.                                                                                                                                                                                                    |
| 19 | Documentation of how data were classified and coded (e.g., multiple raters, blinding and interrater reliability)                           | Mentioned in the "Data extraction" section.                                                                                                                                                                                                                                    |
| 20 | Assessment of confounding (e.g., comparability of cases and controls in studies where appropriate)                                         | No such analysis could be done.                                                                                                                                                                                                                                                |
| 21 | Assessment of study quality, including blinding of quality assessors, stratification or regression on possible predictors of study results | Quality assessment of each of the included studies was evaluated by three authors (MAI, SA and SSA) based on the Joanna Brigg's Institute (JBI) protocol.                                                                                                                      |
| 22 | Assessment of heterogeneity                                                                                                                | To assess the heterogeneity ( $I^2$ ) of the included studies, Chi-squared test was used where $I^2$ assessed the quantity of inconsistency across the studies ( $p < 0.10$ was considered as significant). A value of $I^2$ close to zero indicates homogeneity, whereas, the |

|    |                                                                                                                                                                                                                                                                                |                                                                                                                                                                                                                                                                                                 |
|----|--------------------------------------------------------------------------------------------------------------------------------------------------------------------------------------------------------------------------------------------------------------------------------|-------------------------------------------------------------------------------------------------------------------------------------------------------------------------------------------------------------------------------------------------------------------------------------------------|
|    |                                                                                                                                                                                                                                                                                | following ranges of $I^2$ were used to interpret heterogeneity: low heterogeneity if $I^2=25-50\%$ , moderate heterogeneity if $I^2=51-75\%$ and substantial heterogeneity if $I^2>75\%$ .                                                                                                      |
| 23 | Description of statistical methods (e.g., complete description of fixed or random effects models, justification of whether the chosen models account for predictors of study results, dose-response models, or cumulative meta-analysis) in sufficient detail to be replicated | Described in the “Methods” section.                                                                                                                                                                                                                                                             |
| 24 | Provision of appropriate tables and graphics                                                                                                                                                                                                                                   | We included PRISMA flow diagram (Fig. 1), main forest plots (Fig. 2), Trim and fill funnel plot (Fig. 4), forest plots for sensitivity analyses (Fig. S2), major characteristics table (Table 1), sensitivity analyses table (Table 2) and table of excluded studies (Supplementary Table S3 ). |
| 25 | Graphic summarizing individual study estimates and overall estimate                                                                                                                                                                                                            | Main forest plots (Fig. 2).                                                                                                                                                                                                                                                                     |
| 26 | Table giving descriptive information for each study included                                                                                                                                                                                                                   | Major characteristics table (Table 1).                                                                                                                                                                                                                                                          |
| 27 | Results of sensitivity testing (e.g., subgroup analysis)                                                                                                                                                                                                                       | Fig. S2 & Table 2.                                                                                                                                                                                                                                                                              |
| 28 | Indication of statistical uncertainty of findings                                                                                                                                                                                                                              | 95% confidence intervals were presented with all summary estimates, $I^2$ values and results of subgroup and sensitivity analyses.                                                                                                                                                              |
| 29 | Quantitative assessment of bias (e.g., publication bias)                                                                                                                                                                                                                       | Funnel plot (Fig. 4).                                                                                                                                                                                                                                                                           |
| 30 | Justification for exclusion (e.g.,                                                                                                                                                                                                                                             | Supplementary Table S3. Studies excluded                                                                                                                                                                                                                                                        |

|    |                                                                                                                             |                                                |
|----|-----------------------------------------------------------------------------------------------------------------------------|------------------------------------------------|
|    | exclusion of non-English language citations)                                                                                | from the meta-analysis.                        |
| 31 | Assessment of quality of included studies                                                                                   | Risk of bias assessment table (Table S4 & S5). |
| 32 | Consideration of alternative explanations for observed results                                                              | Discussed in the “Discussion” section.         |
| 33 | Generalization of the conclusions (i.e., appropriate for the data presented and within the domain of the literature review) | Discussed in the “Discussion” section.         |
| 34 | Guidelines for future research                                                                                              | Discussed in the “Discussion” section.         |
| 35 | Disclosure of funding source                                                                                                | None to declare.                               |
