# Supplementary material
Source: MDPI journal article supplement (https://www.mdpi.com/2073-4468/13/1/22)
Supplement: s1 [file s1]

**A**

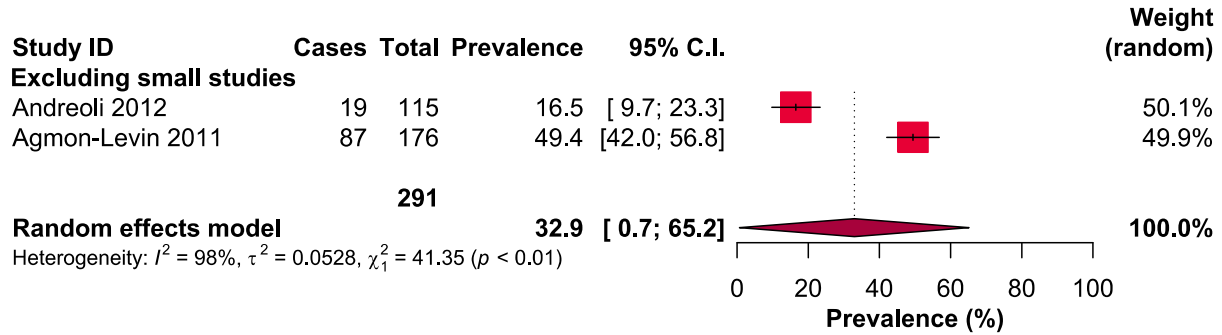

**B**

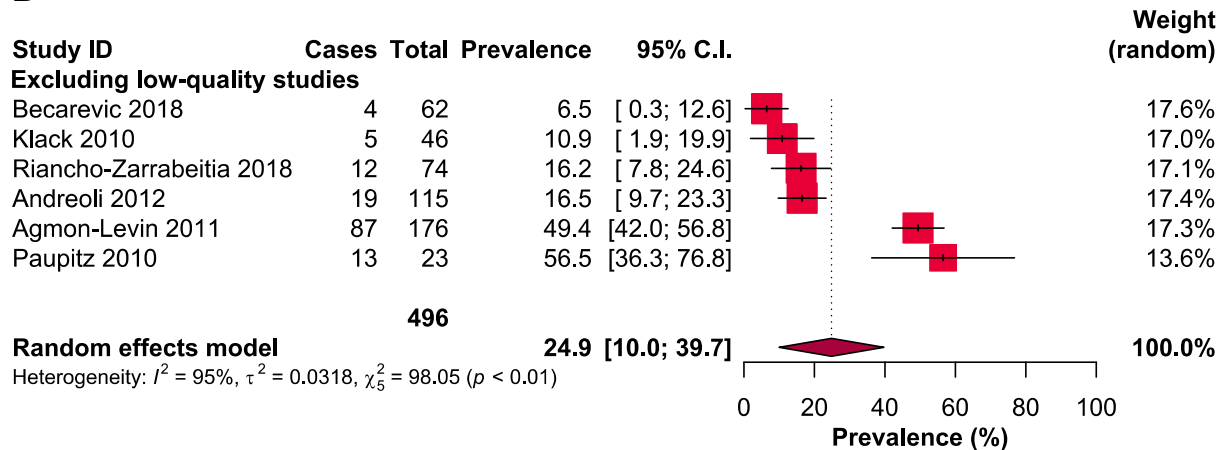

**C**

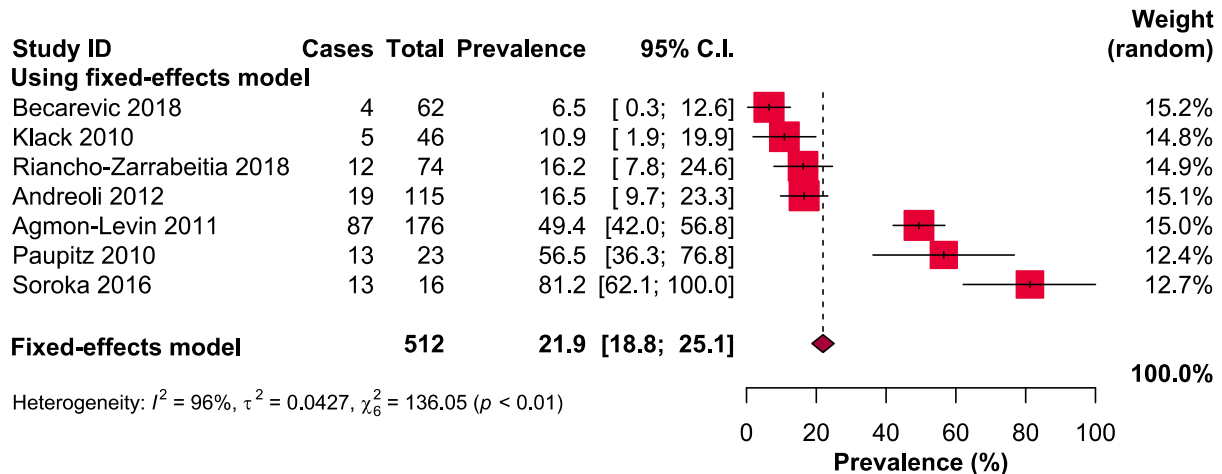

D

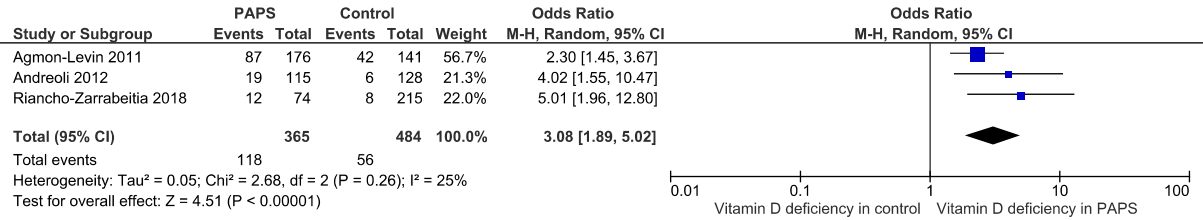

E

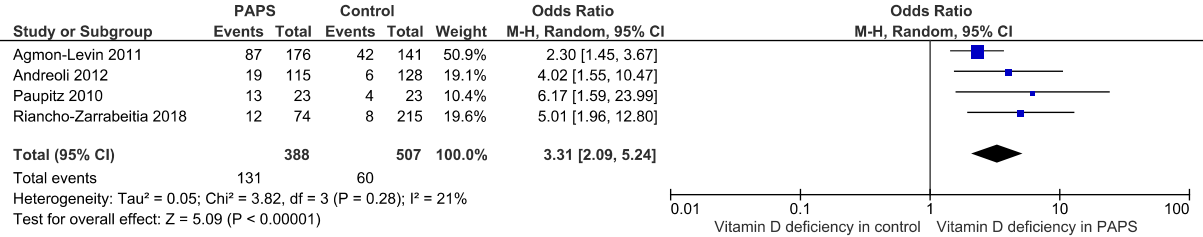

F

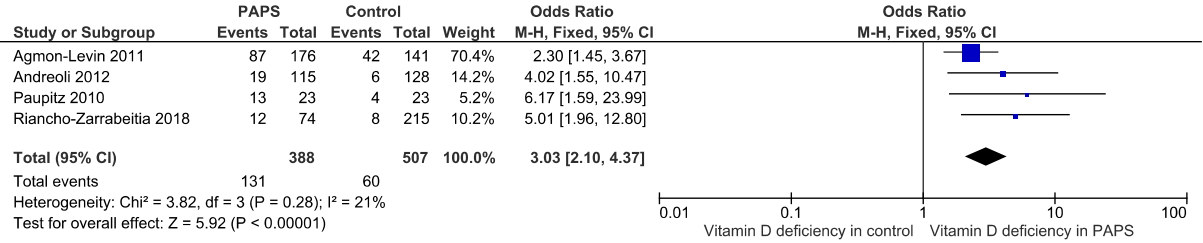

**G**

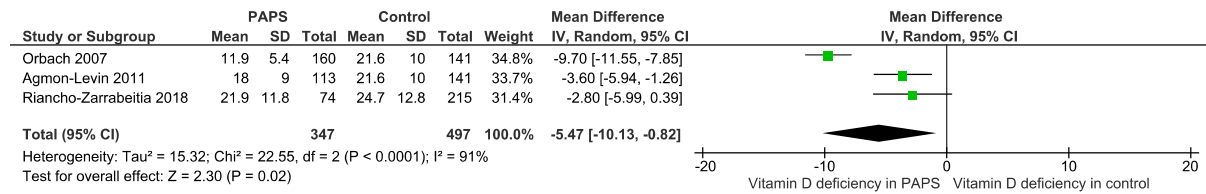

**H**

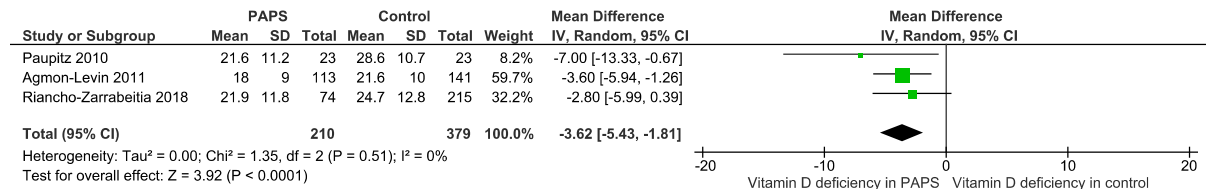

**I**

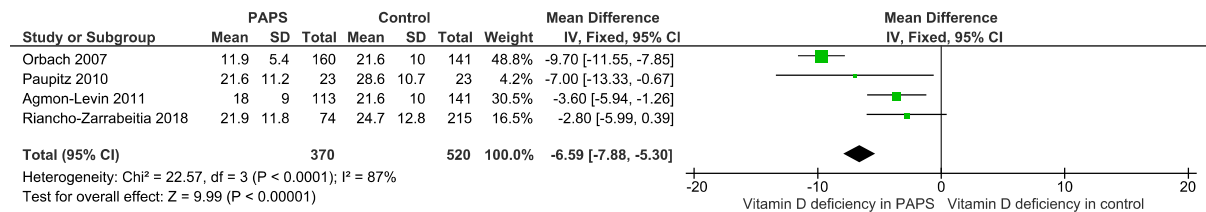

**Figure S2.** Sensitivity analysis. Estimating prevalence (A) excluding small studies (<100), (B) excluding low- and medium-quality studies, (C) using a fixed-effects model; estimating risk ratio (D) excluding small studies (<100), (E) excluding low- and medium-quality studies, (F) using a fixed-effects model and estimating mean difference (G) excluding small studies (<100), (H) excluding low- and medium-quality studies, and (I) using a fixed-effects model.
