# Supplementary material
Source: MDPI journal article supplement (https://www.mdpi.com/2073-4468/13/1/22)
Supplement: s1 [file s1]

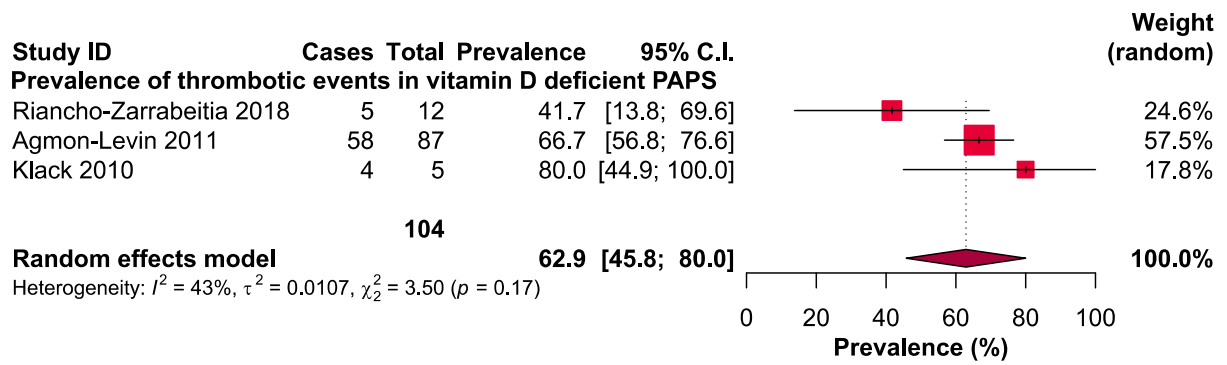

**Figure S1.** Prevalence of thrombotic events in vitamin D deficient patients with primary antiphospholipid syndrome.
